# Supplementary material
Source: PubMed Central journal article supplement (PMC7287441)
Supplement: mmc1.pdf [file mmc1.pdf]

Figure S1. Manual PD algorithm.

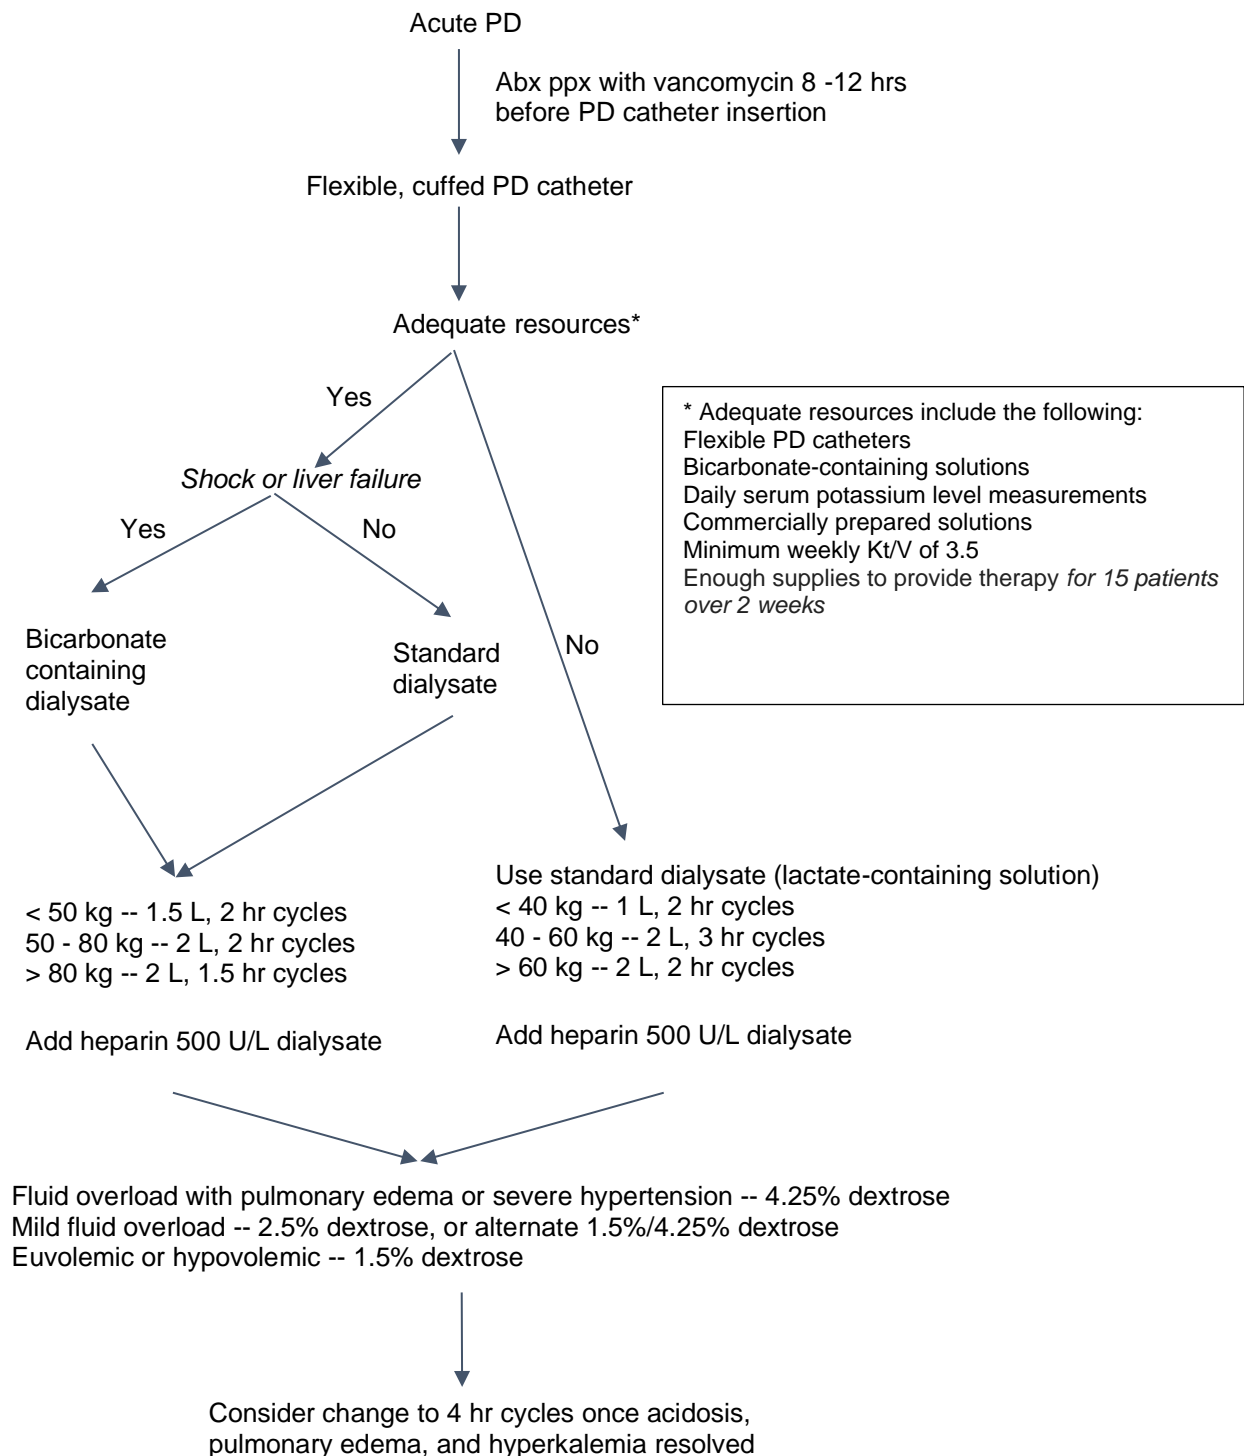

Adapted from Cullis et al 2014 (see reference list in article), with permission of SAGE Publications; original image © 2014 International Society for Peritoneal Dialysis. Abbreviations: PD: peritoneal dialysis; abx: antibiotics; ppx: prophylaxis; U: units; L: liter; hr: hour; kg: kilogram

Figure S2. Cyclor PD algorithm, for days 1-3 on the cyclor.

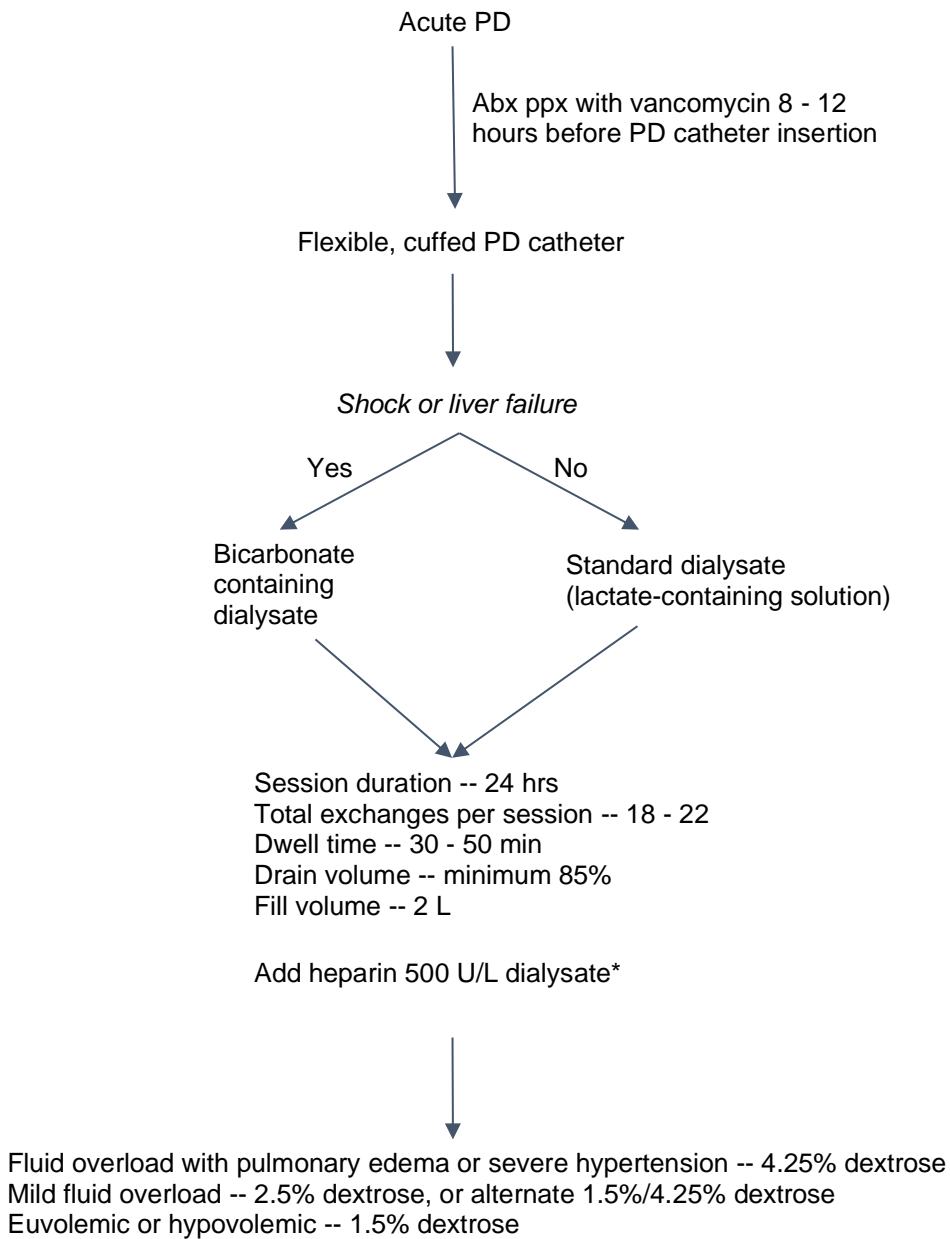

\*Note: dialysate bags used for cyclor are typically 6 liters = 3000 U heparin total

Based on information from Cullis et. al., 2014, Gabriel et. al., 2006, Gabriel et. al., 2007, Ponce et. al., 2012, Chionh et. al., 2010, Uchino et. al., 2005 (see reference list in article).
